# Supplementary material for: RYBP expression is associated with better survival of patients with hepatocellular carcinoma (HCC) and responsiveness to chemotherapy of HCC cells in vitro and in vivo
Source: PubMed Central journal article supplement (PMC4294343; doi:10.18632/oncotarget.2598), 2014-10-18
Supplement: oncotarget-05-11604-s001.pdf [file oncotarget-05-11604-s001.pdf]

**RYBP expression is associated with better survival of patients with hepatocellular carcinoma (HCC) and responsiveness to chemotherapy of HCC cells *in vitro* and *in vivo***

**Supplementary Material**

**Supplementary Table 1: The clinicopathological features of the HCC patients**

| Variables                                 | Results            |
|-------------------------------------------|--------------------|
| Age, years (median, range)                | 53 (18-78)         |
| Gender (male/female)                      | 334/66             |
| Virus infection (HBV/(-)/unknown)         | 356/41/3           |
| Liver cirrhosis (no/yes)                  | 62/338             |
| Preoperative AFP, ng/ml (median, range)   | 94.5 (0.8-60500.0) |
| Preoperative $\gamma$ GT (U/L)            | 52.0 (10.0-812.0)  |
| Tumor multiplicity (single/multiple)      | 340/60             |
| Tumor size, cm (median, range)            | 4.0 (0.4-22.0)     |
| Child-Pugh classification (A/B)           | 379/21             |
| Vascular invasion (absent/present)        | 271/129            |
| Tumor encapsulation (complete/incomplete) | 220/180            |
| Tumor differentiation (well/poor)         | 290/110            |
| AJCC/UICC TNM stage (I/II/III)            | 237/125/38         |
| BCLC stage (A/B/C)                        | 151/120/129        |

Abbreviations: HBV, hepatitis virus B; AFP, alpha-fetoprotein;  $\gamma$ GT, gamma-glutamyl transferase; AJCC/UICC, American Joint Committee on Cancer/Union for International Cancer Control; TNM, tumor-node-metastasis; BCLC, barcelona-clinic liver cancer

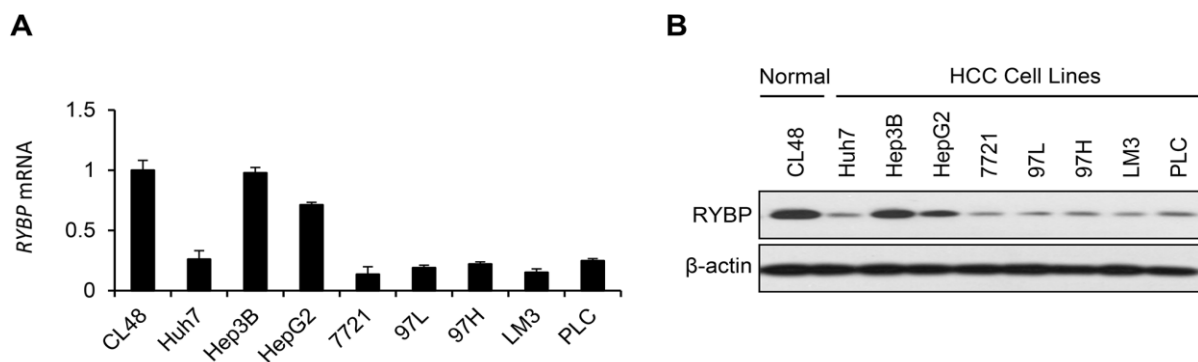

**Supplementary Fig. S1: The expression of RYBP in HCC cell lines.** (A). Quantitative real-time analyses of the RYBP mRNA levels in non-malignant human hepatocytes (CL48) and hepatoma cell lines. (B). Immunoblotting assays of the RYBP protein expression in human normal hepatocytes and hepatoma cell lines.

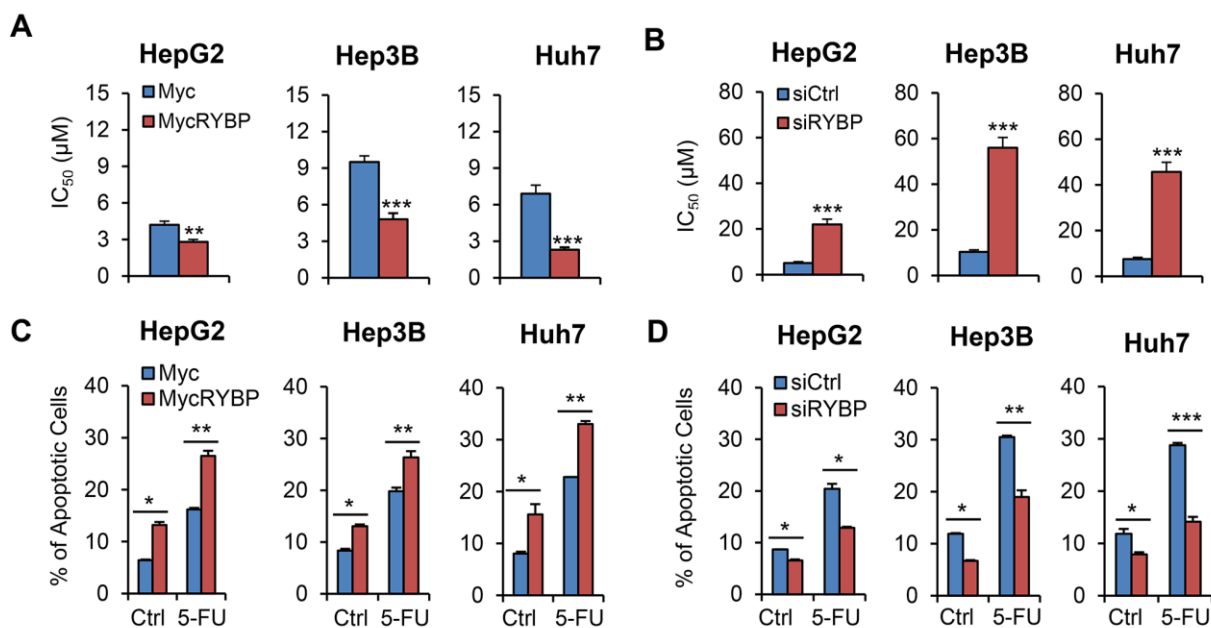

**Supplementary Fig. S2: RYBP overexpression and knockdown affect the chemosensitivity of HCC cells to 5-FU.** HepG2, Hep3B and Huh7 cells were treated with 5-FU and the RYBP plasmid (24 h) or with RYBP siRNA (48 h), then the IC<sub>50</sub> values was determined by the MTT assay (A and B) and cell apoptosis was determined by the Annexin V-FITC method (C and D).

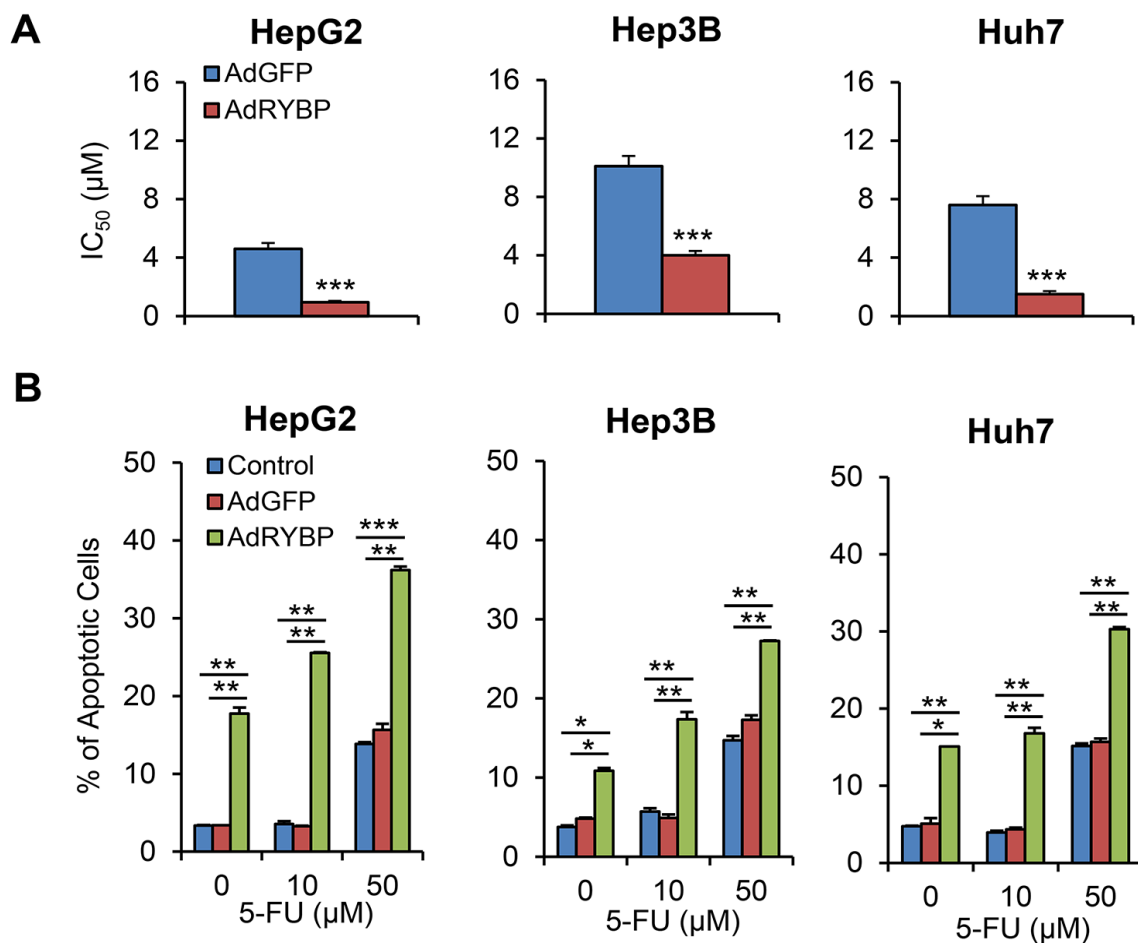

**Supplementary Fig. S3: AdRYBP infection increased the chemosensitivity of HCC cells to 5-FU.** HepG2, Hep3B and Huh7 cells were treated with 5-FU and the AdRYBP plasmid (24 h), then the IC<sub>50</sub> values were determined by the MTT assay (A) and cell apoptosis was determined by the Annexin V-FITC method (B).
